# Supplementary material for: Magnetic mesoporous bioactive glass for synergetic use in bone regeneration, hyperthermia treatment, and controlled drug delivery
Source: PubMed Central journal article supplement (PMC9054387; doi:10.1039/c9ra09349d), 2020-06-04
Supplement: RA-010-C9RA09349D-s001.pdf [file RA-010-C9RA09349D-s001.pdf]

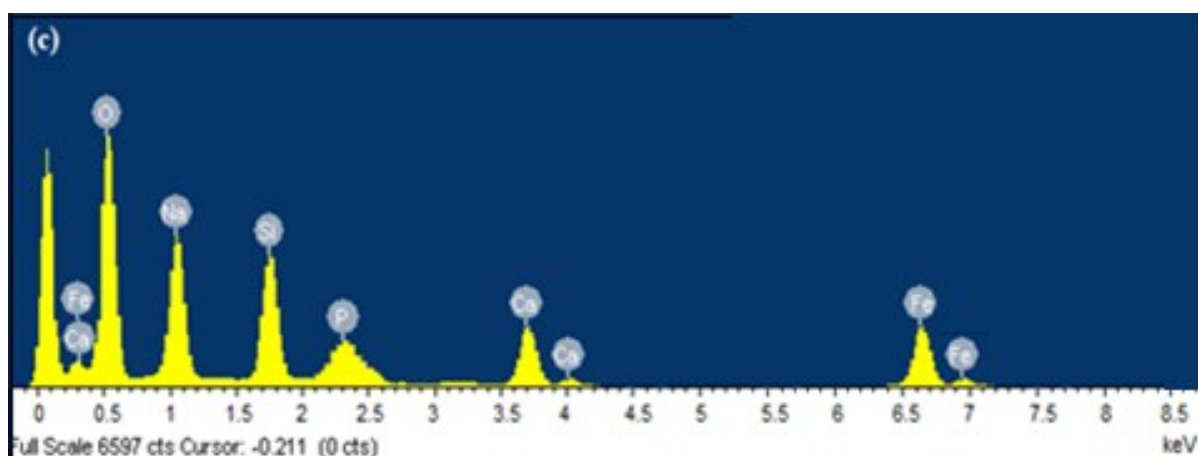

**Figure S1:** EDX spectra of Fe<sub>3</sub>O<sub>4</sub>-MBG

**Table S1:** % composition of Fe<sub>3</sub>O<sub>4</sub>-MBG

| Element   | Mole ratio | mass ratio  | Wt % based on chemical formula | Wt % based on EDX |
|-----------|------------|-------------|--------------------------------|-------------------|
| Si        | 51         | 1428        | 19                             | 19.3              |
| Ca        | 18         | 720         | 9.6                            | 9.4               |
| Na        | 40         | 920         | 12.2                           | 11.9              |
| P         | 8          | 248         | 3.3                            | 3.1               |
| <b>Fe</b> | <b>21</b>  | <b>1176</b> | <b>15.6</b>                    | <b>15.3</b>       |
| O         | 188        | 3008        | 40.1                           | 41                |

**Table S2:** For Reviewer only

| Concentration<br>µg/mL | Cell Viability (%)                         |     |     |                                             |     |     |                                                |     |     |                     |     |     |
|------------------------|--------------------------------------------|-----|-----|---------------------------------------------|-----|-----|------------------------------------------------|-----|-----|---------------------|-----|-----|
|                        | Fe <sub>3</sub> O <sub>4</sub> -MBG (NHFB) |     |     | Fe <sub>3</sub> O <sub>4</sub> -MBG (MG-63) |     |     | Mc-Fe <sub>3</sub> O <sub>4</sub> -MBG (MG-63) |     |     | Mitomycin C (MG-63) |     |     |
| 0.00                   | 100                                        | 100 | 100 | 100                                         | 100 | 100 | 100                                            | 100 | 100 | 100                 | 100 | 100 |
| 3.125                  | 100                                        | 100 | 99  | 99                                          | 100 | 99  | 89                                             | 87  | 86  | 67                  | 60  | 62  |
| 6.25                   | 99                                         | 98  | 98  | 98                                          | 98  | 99  | 70                                             | 72  | 76  | 20                  | 25  | 26  |
| 12.50                  | 95                                         | 94  | 96  | 97                                          | 98  | 95  | 40                                             | 38  | 36  | 10                  | 12  | 16  |
| 25.00                  | 92                                         | 91  | 92  | 96                                          | 95  | 96  | 21                                             | 22  | 23  | 7                   | 10  | 6   |
| 50.00                  | 89                                         | 90  | 90  | 80                                          | 82  | 83  | 10                                             | 11  | 13  | 3                   | 2   | 1   |
